# Supplementary material for: Cow-to-mouse fecal transplantations suggest intestinal microbiome as one cause of mastitis
Source: Microbiome. 2018 Nov 8;6:200. doi: 10.1186/s40168-018-0578-1 (PMC6225715; doi:10.1186/s40168-018-0578-1)
Supplement: Supplementary file 6 — Table S5. Level of inflammatory cytokines in various mouse tissues as measured by ELISA. (XLSX 10 kb) [file 40168_2018_578_MOESM6_ESM.xlsx]

## Sheet: Sheet1
Table S5. Level of inflammatory cytokines in various mouse tissues as measured by ELISA.
Tissue	Inflammatory cytokines	Level of cytokines in Group M	Level of cytokines in Group P	Level of cytokines in Group H
Serum	IFN-y (ng/ml)	662.31±147.54	453.88±83.6	435.5±48.74
	IL-17 (pg/ml)	1069.9±441.88	621.17±160.73	352.9±172.82
	Endotoxin (EU/ml)	4.74±0.23	4.36±0.08	4.2±0.14
	IL-4 (pg/ml)	135.56±20.58	121.44±8.75	107.98±4.76
	IL-10 (pg/ml)	417.16±18.01	395.92±25.47	378.71±27.18
	LZM (ng/ml)	19.27±1.16	14.14±1	12.7±0.6
Spleen	IL-17 (pg/ml)	383.76±49.56	355.36±66.21	308.75±38.18
Colon	IL-1β (pg/ml)	535.87±140.02	359.09±108.93	313.77±101.66
Jejunum	tnf-α (ng/ml)	305.41±375.72	220.65±190.62	121.58±24.01
	IL-6 (pg/ml)	173.49±188.77	133.75±106.89	58.38±16.21
	MPO (ng/ml)	34.06±43.61	34.62±49.48	17.24±10.38
Mammary gland	tnf-α (ng/ml)	804.79±521.53	1080.72±498.35	287.95±163.19
	IL-6 (pg/ml)	501.94±320.52	828.67±398.64	158.78±87.38
	MPO (ng/ml)	144.57±72.08	156.53±31.32	60.23±34.68
